# Supplementary material for: Anaplastic Carcinoma Of The Pancreas Appearing With Low Back Pain Due To Epidural Spinal Cord Compression: A Case Report
Source: Research Square preprint supplement (doi:10.21203/rs.3.rs-386199/v1), 2021-04-26
Supplement: Supplementary file 1 [file f60371570e48903000f9d561.pdf]

## Patient Consent for Publication of Identifying Material in Case Reports in (*Physical Therapy*) *PTJ*

I give my permission for the following material to appear in the print, online, and licensed versions of *PTJ* and for *PTJ* to grant permission to third parties to reproduce this material.

Title or subject of article, photograph, or video: Anaplastic Carcinoma of the pancreas appearing with low back pain due to epidural spinal cord compression: A case report

I understand that my name will not be published but that complete anonymity cannot be guaranteed.

Please check the appropriate box below after reading each statement.

I have read the manuscript or a general description of what the manuscript contains and reviewed all illustrations, photographs, or video files (if included) in which I am included that will be published.

or

I have been offered the opportunity to read the manuscript and to see all illustrations, photographs, or video files (if included) in which I am included, but I waive my right to do so.

Signed

Cagdas

Date

05.11.2020

Print name

Cagdas ERKEN

If you are granting permission for another person, what is your relationship to that person?

HER SON.
